# Supplementary material for: Practical corrections for p(H,D) measurements in mixed H2O/D2O biological buffers
Source: Royal Society of Chemistry journal article supplement (doi:10.1039/c7ay00669a), 2017-01-01
Supplement: c7ay00669a2.pdf [file c7ay00669a2.pdf]

### A brief history of p(H,D) results

The practice of making corrections for changing between H<sub>2</sub>O and D<sub>2</sub>O was mentioned in a 1945 paper by Fischer and Potter<sup>1</sup>—prior to the Covington et al.<sup>2</sup> and the Mikkelsen and Nielsen<sup>3</sup> publications. They noted that commonly we are “... setting the instrument with normal water and applying a correction to the 'apparent pH'.” The correction they suggested for a glass/calomel system is +0.25 pD units at room temperature. In fact, only a year later in a paper from the same group recommending the 0.41 pH-unit correction,<sup>4</sup> critically evaluated the values of  $\Delta pK_a$  for 15 different weak acids. They were interested in checking an observation that  $\Delta pK_a$  changed nearly linearly with  $pK_a^H$ , but found the relationship did not hold. In addition, the values of  $\Delta pK_a$  were not described by adding a single value as suggested by Covington, et al.<sup>2</sup>

Many early papers dating back to the 1930s described the effects of D<sub>2</sub>O on p(H,D) values for measurements on buffers using glass electrodes with H<sub>2</sub>O internal filling solutions; the experimental values of  $\Delta pK_a$  for the various acids and buffer systems that were used for testing were reported. As introduced above, the measurements covered in those papers did not show a consistent difference of 0.41 between D<sub>2</sub>O and H<sub>2</sub>O.

In a 1936 paper, Korman and La Mer<sup>5</sup> reported  $\Delta pK_a$  values for salicylic acid of 0.60 and for acetic acid of 0.48. (Other, later measurements of acetic acid found  $\Delta pK_a = 0.509 \pm 0.006^6$  and  $0.5132.^7$ ) In 1936, Schwarzenbach et al.,<sup>8</sup> using a half cell consisting of the buffers in D<sub>2</sub>O with a Pt|D<sub>2</sub> electrode measured versus a calomel electrode in H<sub>2</sub>O connected by a capillary, reported *inter alia* for phosphoric acid  $\Delta pK_{a1} = 0.206$  and  $\Delta pK_{a2} = 0.461$  and for acetic acid  $\Delta pK_a = 0.457$ . In 1939, Martin and Butler<sup>9</sup> reported dissociation constants obtained spectrophotometrically for a number of acids and also collected data from other publications to show that  $\Delta pK_a$  exhibited a not quite monotonic increase as a function of the measured  $pK_a^H$ . But the  $\Delta pK_a$  values ranged from 0.44 for chloroacetic acid to 0.57 for *o*-nitrophenol and 0.61 for 3,5-dinitrophenol.

Later papers confirmed the variations in  $\Delta pK_a$ s. In 1941, Kingerley and La Mer<sup>10</sup> found that at 25 °C for the H<sub>2</sub>O dissociation,  $pK_a^H = 13.97$ , and for that of D<sub>2</sub>O,  $pK_a^D = 14.81$ . That is,  $\Delta pK_a = 0.838$ . In 1960 Glasoe and Long<sup>11</sup> published a note showing that for a 0.01 M DCl pH ~2 solution, the value of pD measured was *lower* by 0.39 to 0.40 units with the same result for four different commercial glass pH electrodes. They also noted the  $\Delta pK_a$  values for eight different acids, and their measured  $\Delta pK_a$  values at

comparable ionic strengths varied between +0.20 and +0.63. But other than acetate, the buffers were not those that are now commonly used especially in biological *in vitro* solutions. Also, in approximate agreement with Covington et al.,<sup>2</sup> the earlier 1960 paper from Mikkelsen and Nielsen<sup>3</sup> reported results from measuring the potential of a glass electrode against a calomel electrode in pure H<sub>2</sub>O compared to the glass electrode against a calomel electrode with D<sub>2</sub>O for both inside and outside solutions. They found that  $pD = pH + 0.44$  at 22 °C. In 1964, Salomaa et al.<sup>12</sup> used a glass electrode filled with H<sub>2</sub>O to measure the first ionization constants of phosphoric acid, arsenic acid, and acetic acid as they changed with D<sub>2</sub>O content and ionic strength. The acetate buffer was also measured with conductivity, which produced the same result. Together, these measurements showed that the liquid junction potential did not contribute significantly to the p(H,D) measurement. In addition, the dependence on the D<sub>2</sub>O content was slightly nonlinear, and the values of  $\Delta pK_a$  were 0.20, 0.29, and 0.52 respectively. Then in 1966, Wehry and Rogers<sup>13</sup> measured the  $\Delta pK_a$ s for a number of substituted phenols spectrophotometrically. The  $\Delta pK_a$ s do tend to increase with increasing  $pK_a^H$ ,<sup>5, 6, 9, 11, 14, 15</sup> but the measured  $\Delta pK_a$  varied over a range of 0.48 to 0.62 with the  $pK_a^H$  values ranging from 4.06 to 10.24. Even though there is a tendency to have a  $\Delta pK_a$  increase with  $pK_a^H$ , it is not a hard and fast rule. For example Gold and Lowe<sup>6</sup> found that acetic acid and borate with  $pK_a$ s of 4.8 and 9.2 have similar  $\Delta pK_a$  values near 0.5. Later results confirmed the variations. In 1975, Lowe and Smith<sup>16</sup> measured the dissociation constant of benzoic acid as a function of D<sub>2</sub>O volume fraction both with conductance and with a glass electrode. They found the dissociation constants in H<sub>2</sub>O and D<sub>2</sub>O to be  $4.201 \pm 0.004$  and  $4.693 \pm 0.004$ , respectively;  $\Delta pK_a = 0.492$  and essentially the same by both techniques. As noted in the descriptions above, a number of other groups have also seen a nearly linear dependence with the volume fraction of D<sub>2</sub>O.<sup>5, 6, 11, 12, 17</sup> And finally, in 1985  $\Delta pK_a$ s for glycine, alanine, and ethylenediamine—three buffers with  $pK_a$  values near 10—were measured.<sup>18</sup> They have  $\Delta pK_a$  values of 0.64, 0.67, and 0.57, respectively.

## Supplement References

1. R. B. Fischer and R. A. Potter, USAEC MDDC-715, Oak Ridge, TN, Editon edn., 1945, vol. MDDC-715.
2. A. K. Covington, M. Paabo, R. A. Robinson and R. G. Bates, *Anal. Chem.*, 1968, **40**, 700-706.
3. K. Mikkelsen and S. O. Nielsen, *J. Phys. Chem.*, 1960, **64**, 632-637.
4. R. A. Robinson, M. Paabo and R. G. Bates, *J. Resh. N.B.S.*, 1969, **73A**, 299-308.
5. S. Korman and V. K. La Mer, *J. Amer. Chem. Soc.*, 1936, **58**, 1396-1403.
6. V. Gold and B. M. Lowe, *J. Chem. Soc.(A)*, 1968, 1923-1932.
7. R. Gary, R. G. Bates and R. A. Robinson, *J. Phys. Chem.*, 1965, **69**, 2750-2753.
8. G. Schwarzenbach, A. Epprecht and H. Erlenmeyer, *Helv. Chim. Acta*, 1936, **19**, 1292-1304.
9. D. C. Martin and J. A. V. Butler, *J. Chem. Soc.*, 1939, 1366-1369.
10. R. W. Kingerley and V. K. La Mer, *J. Amer. Chem. Soc.*, 1941, **63**, 3256-3262.
11. P. K. Glasoe and F. A. Long, *J. Phys. Chem.*, 1960, **64**, 188-190.
12. P. Salomaa, L. L. Schaleger and F. A. Long, *J. Amer. Chem. Soc.*, 1964, **86**, 1-7.
13. E. L. Wehry and L. B. Rogers, *J. Amer. Chem. Soc.*, 1966, **88**, 351-354.
14. C. K. Rule and V. K. La Mer, *J. Amer. Chem. Soc.*, 1938, **60**, 1974-1981.
15. A. Krężel and W. Bal, *J. Inorg. Biochem.*, 2004, **98**, 161-166.
16. B. M. Lowe and D. G. Smith, *J. Chem. Soc., Farad Trans 1*, 1975, 389-397.
17. E. L. Purlee, *J. Amer. Chem. Soc.*, 1959, **81**, 263-272.
18. S. P. Dagnall, D. N. Hague, M. E. McAdam and A. D. Moreton, *J. Chem. Soc., Faraday Trans. 1*, 1985, **81**, 1483-1494.
